# Supplementary material for: Shell Deformities in the Green-Lipped Mussel Perna viridis: Occurrence and Potential Environmental Stresses on the West Coast of Peninsular Malaysia
Source: MDPI journal article supplement (doi:10.3390/pollutants3030028), 2023-09-04
Supplement: s1 [file s1]

## Article

# Shell Deformities in the Green-Lipped Mussel *Perna viridis*: Occurrence and Potential Environmental Stresses on the West Coast of Peninsular Malaysia

Chee Kong Yap <sup>1,\*</sup>, Sarini Ahmad Wakid <sup>1,2</sup>, Jia Ming Chew <sup>1</sup>, Jumria Sutra <sup>1</sup>, Wan Mohd Syazwan <sup>1</sup>, Nor Azwady Abd Aziz <sup>1</sup>, Muskhazli Mustafa <sup>1</sup>, Rosimah Nulit <sup>1</sup>, Hideo Okamura <sup>3</sup>, Yoshifumi Horie <sup>3</sup>, Meng Chuan Ong <sup>4,5</sup>, Mohamad Saupi Ismail <sup>6</sup>, Ahmad Dwi Setyawan <sup>7,8</sup>, Krishnan Kumar <sup>9</sup>, Hesham M. H. Zakaly <sup>10,11</sup> and Wan Hee Cheng <sup>9</sup>

- <sup>1</sup> Department of Biology, Faculty of Science, Universiti Putra Malaysia, Serdang 43400, Selangor, Malaysia; sariniaahmadwakid@gmail.com (S.A.W.); jiaming0112@gmail.com (J.M.C.); jumriasutra@gmail.com (J.S.); mhdasyazwan@upm.edu.my (W.M.S.); azwady@upm.edu.my (N.A.A.A.); muskhazli@upm.edu.my (M.M.); rosimah@upm.edu.my (R.N.)
- <sup>2</sup> School of Biology, Universiti Teknologi MARA, Negeri Sembilan Branch, Kuala Pilah Campus, Kuala Pilah 72000, Negeri Sembilan, Malaysia
- <sup>3</sup> Graduate School of Maritime Sciences, Faculty of Maritime Sciences, Kobe University, Kobe 658-0022, Japan; okamura@maritime.kobe-u.ac.jp (H.O.); horie@people.kobe-u.ac.jp (Y.H.)
- <sup>4</sup> Faculty of Science and Marine Environment, Universiti Malaysia Terengganu, Kuala Nerus 21030, Terengganu, Malaysia; ong@umt.edu.my
- <sup>5</sup> Ocean Pollution and Ecotoxicology (OPEC) Research Group, Universiti Malaysia Terengganu, Kuala Nerus 21030, Terengganu, Malaysia
- <sup>6</sup> Fisheries Research Institute, Batu Maung 11960, Pulau Pinang, Malaysia; saupi@rocketmail.com
- <sup>7</sup> Department of Environmental Science, Faculty of Mathematics and Natural Sciences, Universitas Sebelas Maret, Jl. Ir. Sutami 36A, Surakarta 57126, Central Java, Indonesia; volatileoils@gmail.com
- <sup>8</sup> Biodiversity Research Group, Universitas Sebelas Maret, Jl. Ir. Sutami 36A, Surakarta 57126, Central Java, Indonesia
- <sup>9</sup> Faculty of Health and Life Sciences, INTI International University, Persiaran Perdana BBN, Nilai 71800, Negeri Sembilan, Malaysia; kumar.krishnan@newinti.edu.my (K.K.); wanhee.cheng@newinti.edu.my (W.H.C.)
- <sup>10</sup> Physics Department, Faculty of Science, Al-Azhar University, Asyut 71524, Egypt; h.m.zakaly@gmail.com
- <sup>11</sup> Institute of Physics and Technology, Ural Federal University, 620002 Yekaterinburg, Russia
- \* Correspondence: yapckong@hotmail.com or yapchee@upm.edu.my

**Citation:** Yap, C.K.; Ahmad Wakid, A.; Chew, J.M.; Sutra, J.; Syazwan, W.M.; Aziz, N.A.A.; Mustafa, M.; Nulit, R.; Okamura, H.; Horie, Y.; et al. Shell Deformities in the Green-Lipped Mussel *Perna viridis*: Occurrence and Potential Environmental Stresses on the West Coast of Peninsular Malaysia. *Pollutants* **2023**, *3*, 406–408. <https://doi.org/10.3390/pollutants3030028>

Academic Editors: Mauro Marini and Paolo Pastorino

Received: 3 June 2023

Revised: 20 July 2023

Accepted: 25 July 2023

Published: 4 September 2023

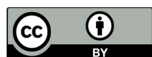

**Copyright:** © 2023 by the authors. Submitted for possible open access publication under the terms and conditions of the Creative Commons Attribution (CC BY) license (<https://creativecommons.org/licenses/by/4.0/>).

**Table S1.** Compilation of allometric data in the green-lipped mussels obtained from the coastal waters of Peninsular Malaysia.

| Location                   | Parit Jawa   |        |       |      | Tangkak      |        |       |      | Sebatu            |        |       |       | Kuala Masai  |       |       |       | Teluk Jawa       |        |        |        | Kg. Pasir Puteh |       |       |      |
|----------------------------|--------------|--------|-------|------|--------------|--------|-------|------|-------------------|--------|-------|-------|--------------|-------|-------|-------|------------------|--------|--------|--------|-----------------|-------|-------|------|
| Type of deformities        | N            | D      | C     | U    | N            | D      | C     | U    | N                 | D      | C     | U     | N            | D     | C     | U     | N                | D      | C      | U      | N               | D     | C     | U    |
| Mean length (mm)           | 76.04        | 75.46  | 68.61 | 0.00 | 73.85        | 74.67  | 72.11 | 0.00 | 70.03             | 70.06  | 70.99 | 70.10 | 63.29        | 66.01 | 68.71 | 62.10 | 90.87            | 94.36  | 98.92  | 94.45  | 58.49           | 50.66 | 56.07 | 0.00 |
| Median length (mm)         | 74.54        | 74.67  | 67.50 | 0.00 | 73.77        | 76.49  | 71.57 | 0.00 | 71.68             | 70.80  | 71.09 | 70.63 | 65.36        | 66.51 | 67.90 | 66.38 | 88.94            | 94.52  | 97.93  | 95.17  | 5.65            | 49.60 | 58.60 | 0.00 |
| Standard error length (mm) | 0.91         | 1.75   | 2.15  | 0.00 | 0.91         | 1.63   | 1.77  | 0.00 | 1.61              | 0.72   | 1.10  | 0.99  | 1.37         | 2.00  | 3.00  | 5.71  | 2.48             | 1.88   | 2.62   | 2.56   | 1.74            | 1.81  | 8.47  | 0.00 |
| Min length (mm)            | 53.59        | 43.09  | 60.48 | 0.00 | 49.43        | 37.63  | 58.93 | 0.00 | 48.00             | 52.37  | 53.56 | 52.40 | 36.32        | 39.62 | 54.96 | 50.75 | 83.80            | 69.98  | 93.15  | 69.98  | 6.10            | 39.60 | 40.30 | 0.00 |
| Max length (mm)            | 109.46       | 101.68 | 80.49 | 0.00 | 90.47        | 89.65  | 85.06 | 0.00 | 88.06             | 91.97  | 85.77 | 91.43 | 90.16        | 89.63 | 92.99 | 69.07 | 100.01           | 116.63 | 105.76 | 120.52 | 96.30           | 70.50 | 69.30 | 0.00 |
| Mean width (mm)            | 25.47        | 24.86  | 25.04 | 0.00 | 26.07        | 27.19  | 25.59 | 0.00 | 31.77             | 32.62  | 32.85 | 32.43 | 21.83        | 23.70 | 24.04 | 21.39 | 41.54            | 41.74  | 44.74  | 41.16  | 24.10           | 21.84 | 18.83 | 0.00 |
| Median width (mm)          | 25.54        | 24.91  | 25.15 | 0.00 | 26.61        | 27.01  | 25.45 | 0.00 | 32.13             | 32.31  | 32.55 | 32.07 | 22.23        | 24.52 | 24.08 | 22.40 | 40.59            | 42.39  | 45.37  | 40.58  | 24.10           | 22.00 | 20.00 | 0.00 |
| Standard error width (mm)  | 0.34         | 0.62   | 1.20  | 0.00 | 0.55         | 0.40   | 0.73  | 0.00 | 0.76              | 0.29   | 0.44  | 0.38  | 0.50         | 0.52  | 0.72  | 2.08  | 1.15             | 0.63   | 1.37   | 0.97   | 0.24            | 0.95  | 0.65  | 0.00 |
| Min width (mm)             | 18.13        | 13.87  | 17.46 | 0.00 | 2.52         | 20.70  | 21.85 | 0.00 | 16.00             | 25.00  | 25.94 | 25.55 | 10.07        | 14.83 | 17.91 | 17.39 | 39.12            | 33.53  | 40.88  | 30.02  | 13.50           | 14.00 | 15.20 | 0.00 |
| Max width (mm)             | 34.13        | 35.96  | 31.76 | 0.00 | 34.49        | 35.17  | 33.70 | 0.00 | 43.40             | 40.92  | 40.30 | 40.92 | 30.68        | 29.13 | 29.26 | 24.38 | 47.02            | 48.50  | 49.09  | 53.05  | 31.20           | 28.60 | 21.30 | 0.00 |
| Mean height (mm)           | 32.76        | 33.07  | 31.84 | 0.00 | 31.46        | 135.93 | 32.04 | 0.00 | 22.50             | 22.71  | 22.53 | 22.41 | 29.10        | 30.65 | 31.03 | 26.27 | 29.82            | 30.52  | 31.90  | 30.39  | 24.76           | 26.05 | 20.73 | 0.00 |
| Median height (mm)         | 32.24        | 33.50  | 31.38 | 0.00 | 32.76        | 32.85  | 31.97 | 0.00 | 22.17             | 22.19  | 22.56 | 22.07 | 29.08        | 30.24 | 30.44 | 26.87 | 30.33            | 30.97  | 32.22  | 30.56  | 24.50           | 26.30 | 22.50 | 0.00 |
| Standard error height (mm) | 0.30         | 0.56   | 0.98  | 0.00 | 0.35         | 0.50   | 0.71  | 0.00 | 0.72              | 0.28   | 0.32  | 0.31  | 0.52         | 0.65  | 1.23  | 1.49  | 0.78             | 0.64   | 0.69   | 0.71   | 0.26            | 1.22  | 0.80  | 0.00 |
| Min height (mm)            | 26.32        | 21.43  | 26.88 | 0.00 | 21.91        | 26.56  | 23.77 | 0.00 | 16.63             | 15.74  | 18.18 | 15.99 | 17.91        | 22.04 | 25.93 | 23.44 | 26.83            | 22.07  | 30.06  | 23.93  | 15.10           | 15.60 | 15.60 | 0.00 |
| Max height (mm)            | 41.55        | 41.52  | 36.46 | 0.00 | 35.22        | 40.64  | 36.76 | 0.00 | 42.03             | 40.60  | 25.78 | 29.13 | 39.64        | 38.64 | 40.70 | 28.51 | 31.82            | 35.91  | 33.64  | 40.75  | 33.50           | 35.60 | 24.10 | 0.00 |
| Mean weight (mm)           | 10.16        | 10.22  | 9.35  | 0.00 | 9.64         | 9.66   | 9.24  | 0.00 | 8.28              | 8.98   | 9.37  | 8.95  | 7.09         | 7.84  | 8.38  | 6.44  | 19.19            | 22.04  | 25.12  | 22.33  | 5.38            | 2.97  | 3.80  | 0.00 |
| Median weight (g)          | 9.54         | 10.43  | 9.04  | 0.00 | 8.95         | 9.37   | 8.77  | 0.00 | 8.63              | 9.10   | 9.25  | 9.16  | 7.16         | 7.54  | 7.04  | 6.77  | 17.61            | 22.08  | 22.60  | 22.44  | 4.90            | 2.90  | 3.90  | 0.00 |
| Standard error weight (g)  | 0.26         | 0.43   | 0.88  | 0.00 | 0.95         | 0.43   | 0.75  | 0.00 | 0.44              | 0.23   | 0.36  | 0.32  | 0.38         | 0.52  | 1.00  | 1.67  | 1.82             | 1.10   | 1.85   | 1.40   | 0.24            | 0.24  | 0.45  | 0.00 |
| Min weight (g)             | 4.80         | 3.42   | 5.30  | 0.00 | 3.84         | 5.18   | 6.21  | 0.00 | 3.64              | 3.44   | 5.16  | 3.44  | 1.37         | 2.03  | 4.50  | 3.39  | 14.10            | 10.09  | 21.83  | 10.09  | 0.20            | 1.70  | 2.70  | 0.00 |
| Max weight (g)             | 19.50        | 19.27  | 15.21 | 0.00 | 60.90        | 18.47  | 18.73 | 0.00 | 13.40             | 17.35  | 15.17 | 17.35 | 17.43        | 15.28 | 18.53 | 9.15  | 26.73            | 35.09  | 30.00  | 37.85  | 15.90           | 6.00  | 4.80  | 0.00 |
| Total number, N            | 130.00       | 58.00  | 13.00 | 0.00 | 57.00        | 48.00  | 17.00 | 0.00 | 40.00             | 126.00 | 44.00 | 68.00 | 93.00        | 38.00 | 15.00 | 3.00  | 6.00             | 38.00  | 5.00   | 27.00  | 117.00          | 19.00 | 3.00  | 0.00 |
| Deformities (%)            | 28.60 6.47   |        |       |      | 39.34 13.93  |        |       |      | 45.12 13.41 17.07 |        |       |       | 25.50 10.07  |       |       |       | 56.25 4.17 27.08 |        |        |        | 13.67 2.16      |       |       |      |
| Total Shell Deformity (%)  | <b>35.32</b> |        |       |      | <b>53.28</b> |        |       |      | <b>75.61</b>      |        |       |       | <b>37.58</b> |       |       |       | <b>87.50</b>     |        |        |        | <b>15.83</b>    |       |       |      |

Note: N: Normal; D: Discontinuous; C: Continuous; U: Unidentified.

**Table S2.** Multiple linear regression analysis between shell lengths (SL) (as dependent variable), and the shell widths, shell heights and total shell weights, in the normal shells and deformed shells of all types (discontinuous, continuous and unidentified deformities) (as independent variables), of *Perna viridis* collected from Sebatu (N= 40).

| Dependent variable          | Independent variables                       | R    | R <sup>2</sup> |
|-----------------------------|---------------------------------------------|------|----------------|
| SL <sub>normal</sub>        | $36.7 + 0.11 (SW) - 0.01 (SH) + 0.88 (TSW)$ | 0.95 | 0.90           |
| SL <sub>discontinuous</sub> | $13.9 + 0.55 (SW) + 0.02 (SH) + 0.33 (TSW)$ | 0.88 | 0.78           |
| SL <sub>continuous</sub>    | $11.9 + 0.59 (SW) + 0.02 (SH) + 0.34 (TSW)$ | 0.92 | 0.84           |
| SL <sub>unidentified</sub>  | $16.7 + 0.44 (SW) + 0.02 (SH) + 0.44 (TSW)$ | 0.86 | 0.74           |

Note: Independent variables are shell width (SW), shell height (SH) and total shell weight (TSW).

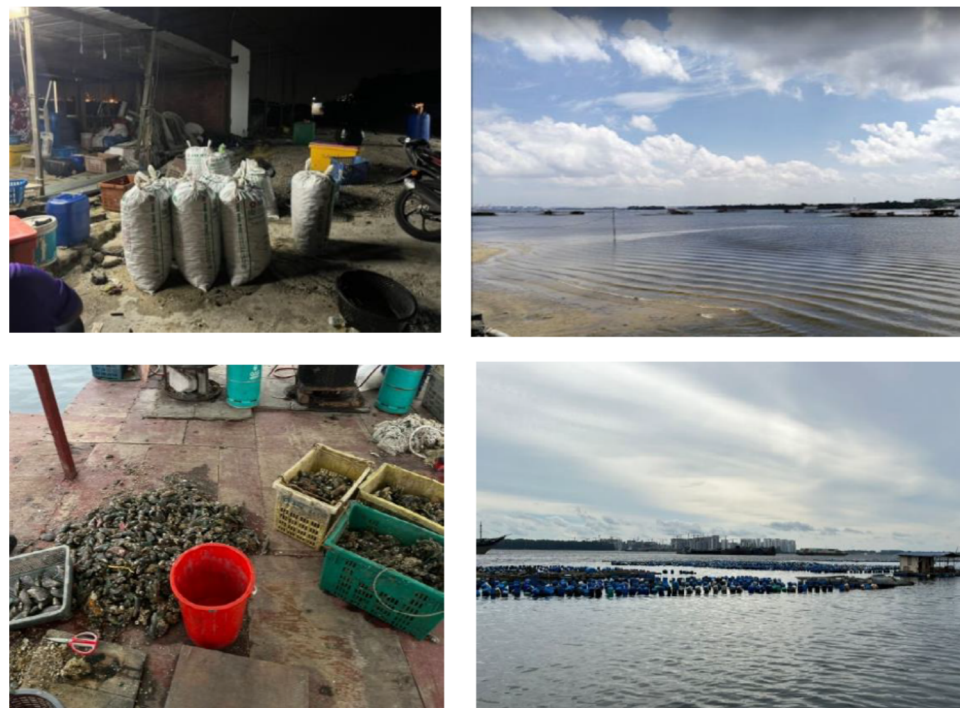

**Figure S1.** Sampling sites in the Straits of Johore.
